# Supplementary material for: A Fast Response Highly Selective Probe for the Detection of Glutathione in Human Blood Plasma
Source: Sensors (Basel). 2012 May 8;12(5):5940–50. doi: 10.3390/s120505940 (PMC3386722; doi:10.3390/s120505940)

## Supplementary Information

**A Fast Response Highly Selective Probe for the Detection of Glutathione in Human Blood Plasma. *Sensors* 2012, 12, 5940-5950**

Yixing Guo <sup>1</sup>, Xiaofeng Yang <sup>2</sup>, Lovemore Hakuna <sup>1</sup>, Aabha Barve <sup>1</sup>, Jorge O. Escobedo <sup>1</sup>, Mark Lowry <sup>1</sup> and Robert M. Strongin <sup>1,\*</sup>

<sup>1</sup> Department of Chemistry, Portland State University, Portland, OR 97201, USA;  
E-Mails: yixing@pdx.edu (Y.G.); lhakun@pdx.edu (L.H.); aabha@pdx.edu (A.B.);  
jescobed@pdx.edu (J.O.E.); mlowry.chem@gmail.com (M.L.)

<sup>2</sup> Key Laboratory of Synthetic and Natural Functional Molecule Chemistry of Ministry of Education, Institute of Analytical Sciences, College of Chemistry & Materials Science, Northwest University, Xi'an 710069, China; E-Mail: xfyang@nwu.edu.cn

\* Author to whom correspondence should be addressed; E-Mail: strongin@pdx.edu;  
Tel.: +1-503-725-9724.

**Figure S1.** <sup>1</sup>H NMR (400 MHz) spectrum of **4** in DMSO-*d*<sub>6</sub>.

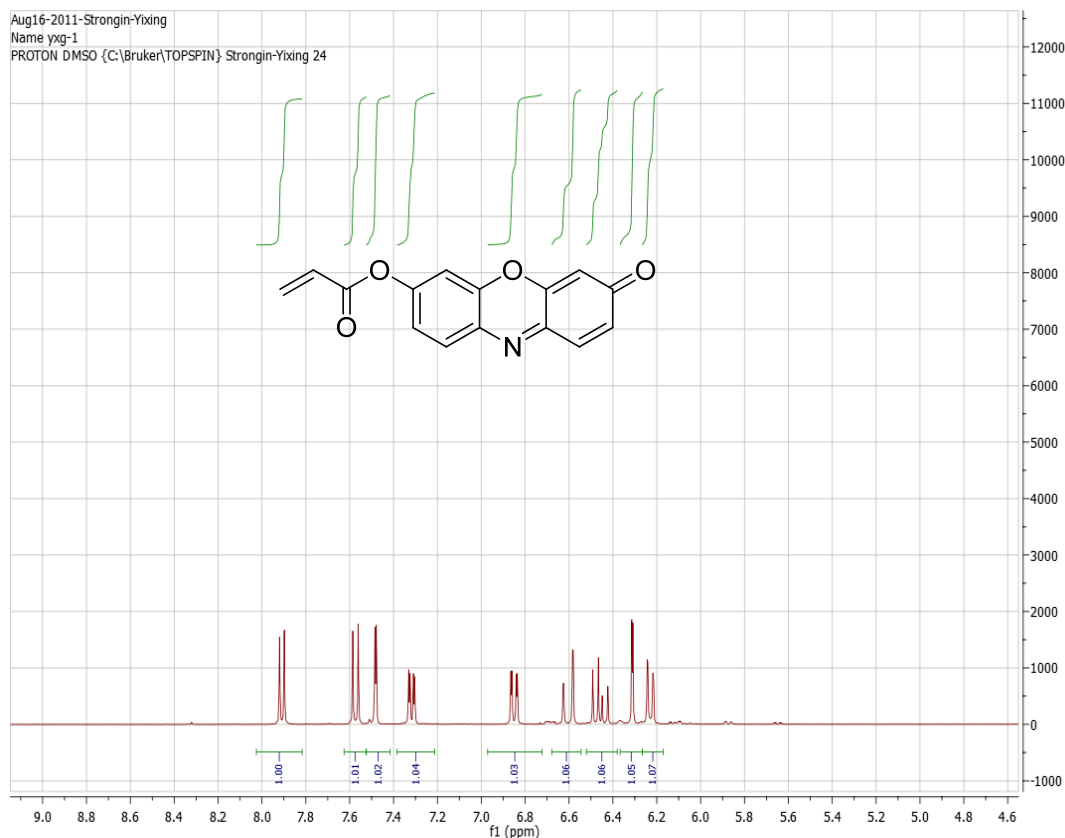

**Figure S2.**  $^{13}\text{C}$  NMR (100 MHz) spectrum of **4** in  $\text{DMSO}-d_6$ .

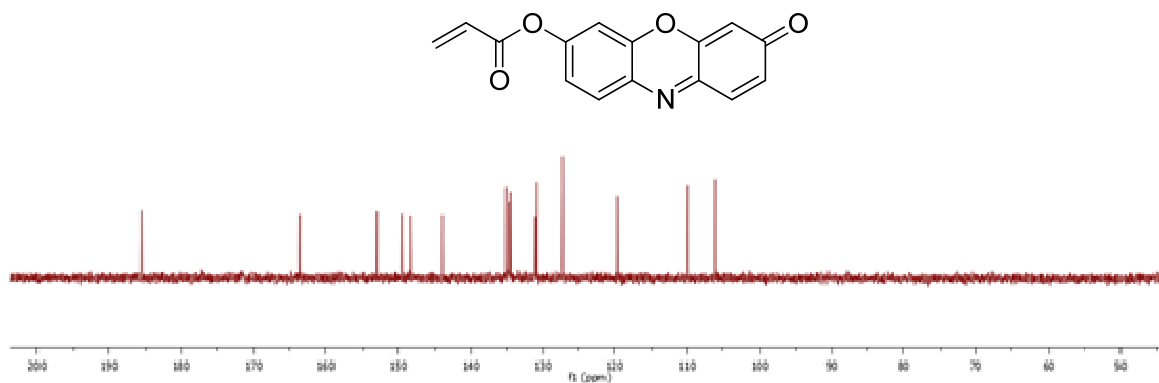

**Figure S3.** HRMS of **4**.

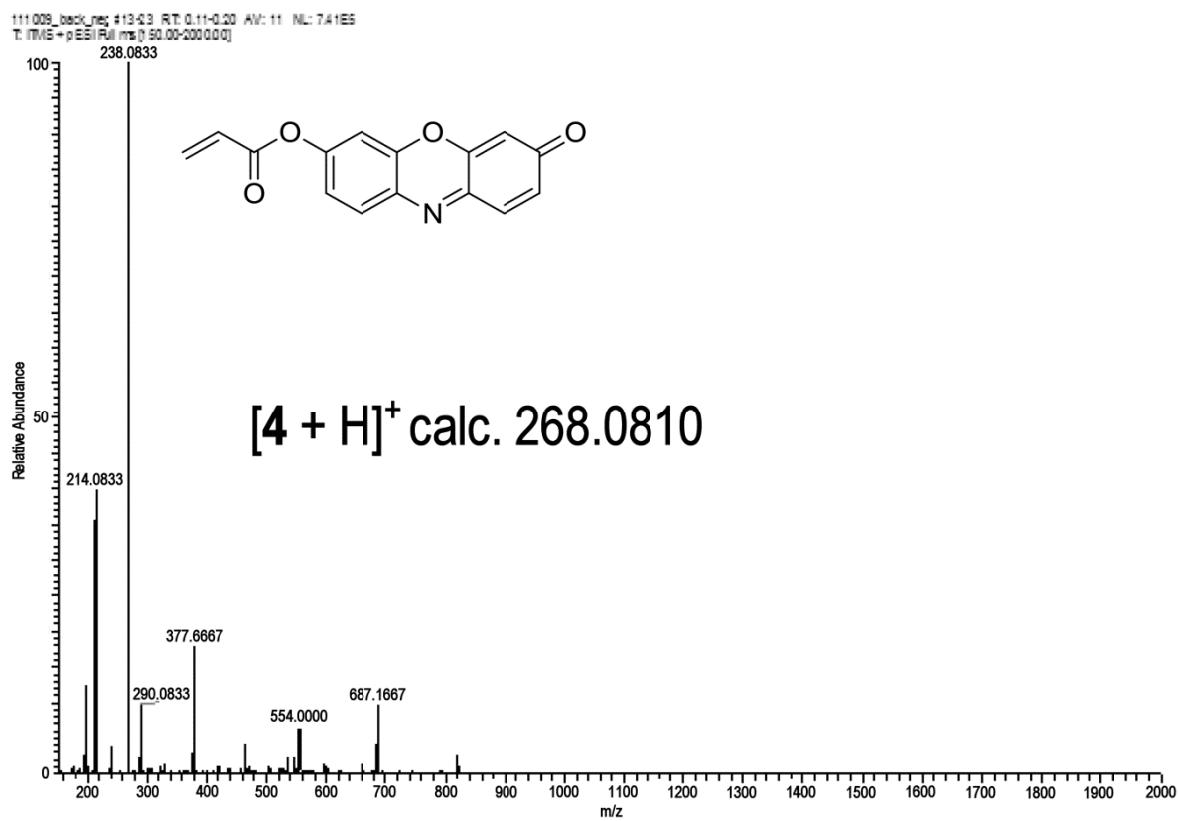

**Figure S4.** Absorption spectrum of **4** (2.5  $\mu\text{M}$ ) in 50 mM phosphate buffer (pH 7.4).

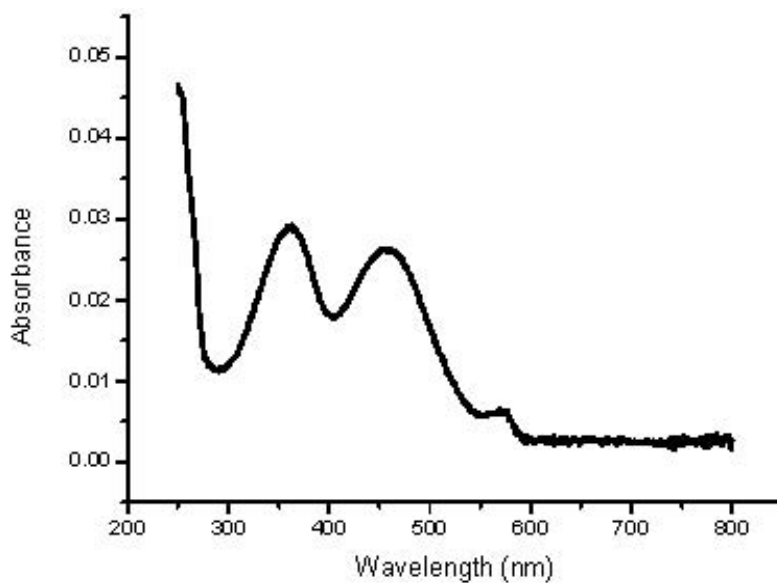

**Figure S5.** Intrinsic linear response of **4** towards Cys. Fluorescence spectra ( $\lambda_{\text{ex}} = 565 \text{ nm}$ ) of **4** (2.5  $\mu\text{M}$ ) upon the addition of increasing concentrations of Cys (0–3  $\mu\text{M}$ ) at pH 7.4 (phosphate buffer, 50 mM). Reaction time, 60 min. The inset shows a linear relationship between fluorescence intensity and Cys concentration with a correlation coefficient of 0.995.

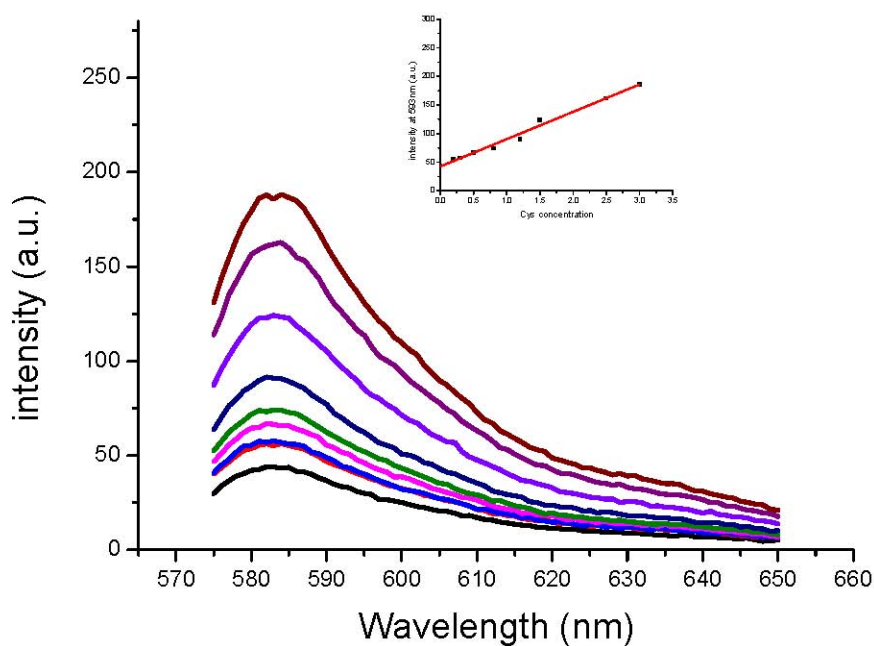

**Figure S6.** HRMS of the reaction mixture of **4** (20  $\mu$ M) and Cys (20  $\mu$ M) in 1:1 MeOH:H<sub>2</sub>O showing formation of **3a**. Reaction time: 3 hours.

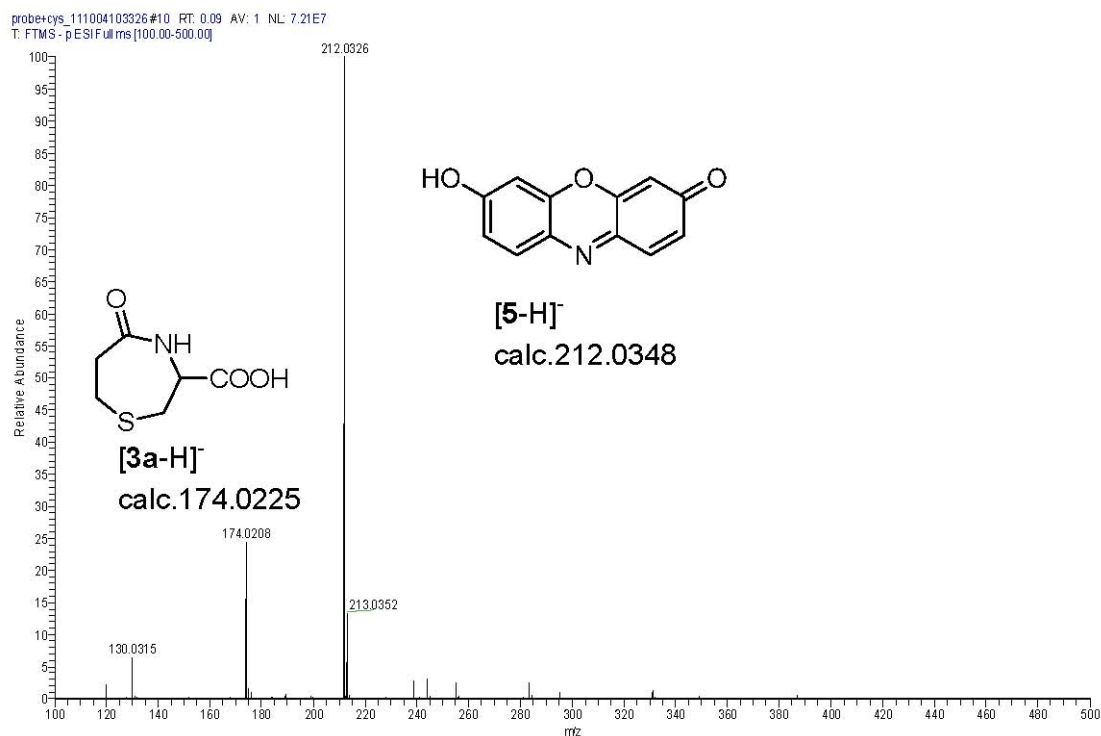

**Figure S7.** HRMS of the reaction mixture of **4** (20  $\mu$ M) and Hcy (20  $\mu$ M) in 1:1 MeOH:H<sub>2</sub>O showing formation of **3b**. Reaction time: 3 hours.

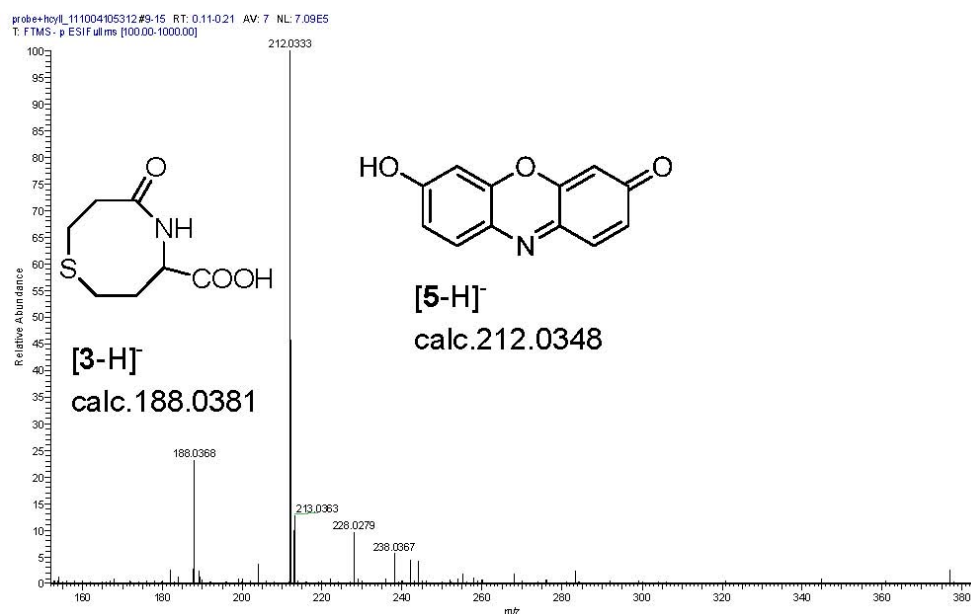

**Figure S8.** Response of **4** towards thiols upon inclusion of various surfactants. Time-dependent fluorescence changes ( $\lambda_{\text{ex}}/\lambda_{\text{em}} = 565/590 \text{ nm}$ ) of **4** (2.5  $\mu\text{M}$ ) towards various thiols (2 equiv) in phosphate buffered media (50 mM, pH = 7.4) including surfactants (a) SDS (10 mM); (b) Triton X-100 (0.3 mM); (c) BC (0.05 mM); (d) CTAB (2 mM).

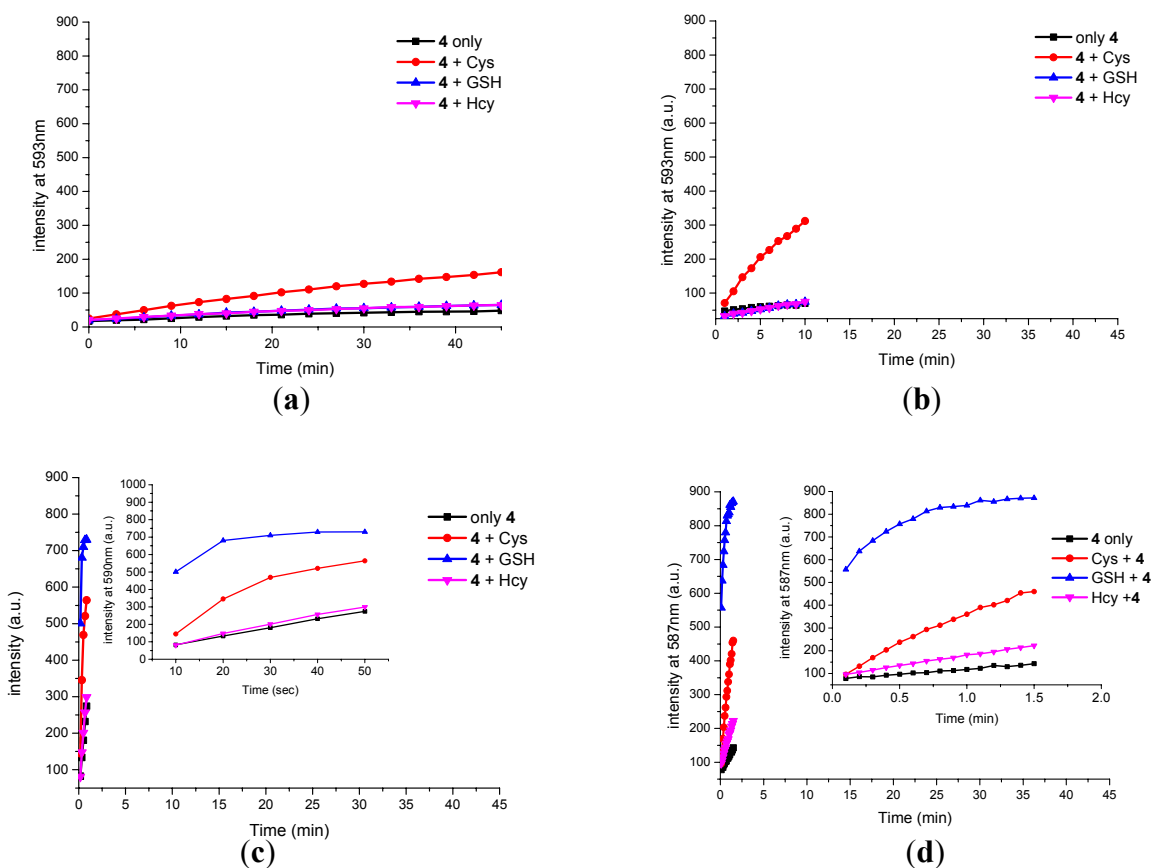

**Figure S9** Surfactant-mediated response of the **4**-CTAB system towards GSH in the presence of Cys. Fluorescence spectra ( $\lambda_{\text{ex}} = 565 \text{ nm}$ ) of **4** ( $1.5 \mu\text{M}$ ) upon the addition of a mixture of Cys ( $2 \mu\text{M}$ ) and increasing concentrations of GSH ( $0\text{--}2 \mu\text{M}$ ) at pH 7.4 (phosphate buffer,  $50 \text{ mM}$ ). Reaction time, 2 min. The inset shows a linear relationship between fluorescence intensity and GSH concentration with a correlation coefficient of 0.990 and also between fluorescence intensity and a mixture GSH and Cys with a correlation coefficient of 0.9894.

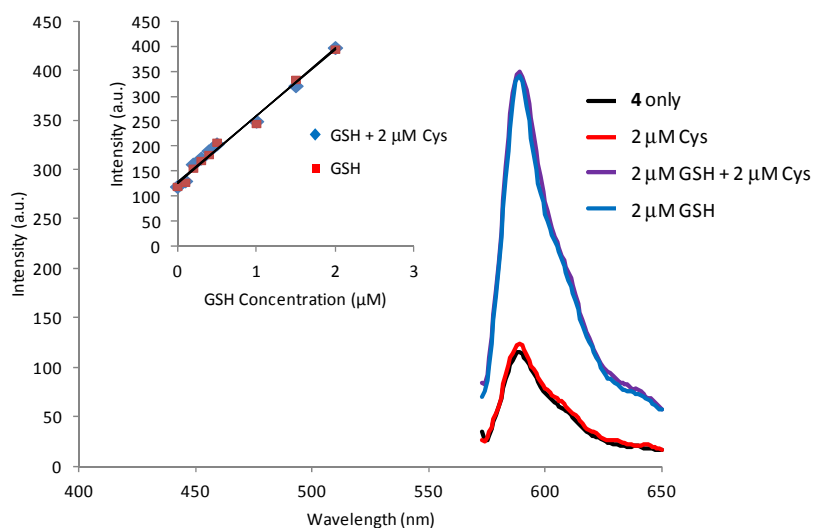

**Figure S10.** HRMS of the reaction mixture of **4** ( $20 \mu\text{M}$ ) and GSH ( $20 \mu\text{M}$ ) in 1:1 MeOH:H<sub>2</sub>O showing the formation of **7**. Reaction time: 3 hours.

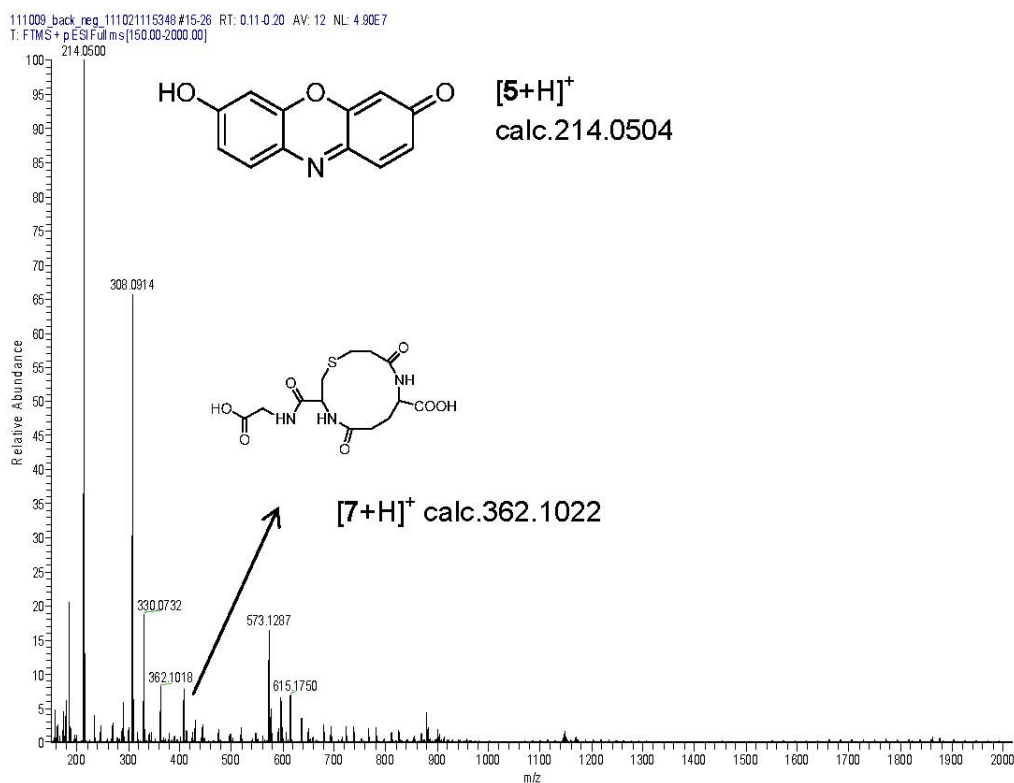

**Figure S11.** HRMS of the reaction mixture of **4** (20  $\mu$ M) and GSH (20  $\mu$ M) in 2.0 mM CTAB medium buffered at pH 7.4 (Hepes buffer, 20 mM) showing the formation of **7**. Reaction time: 5 min.

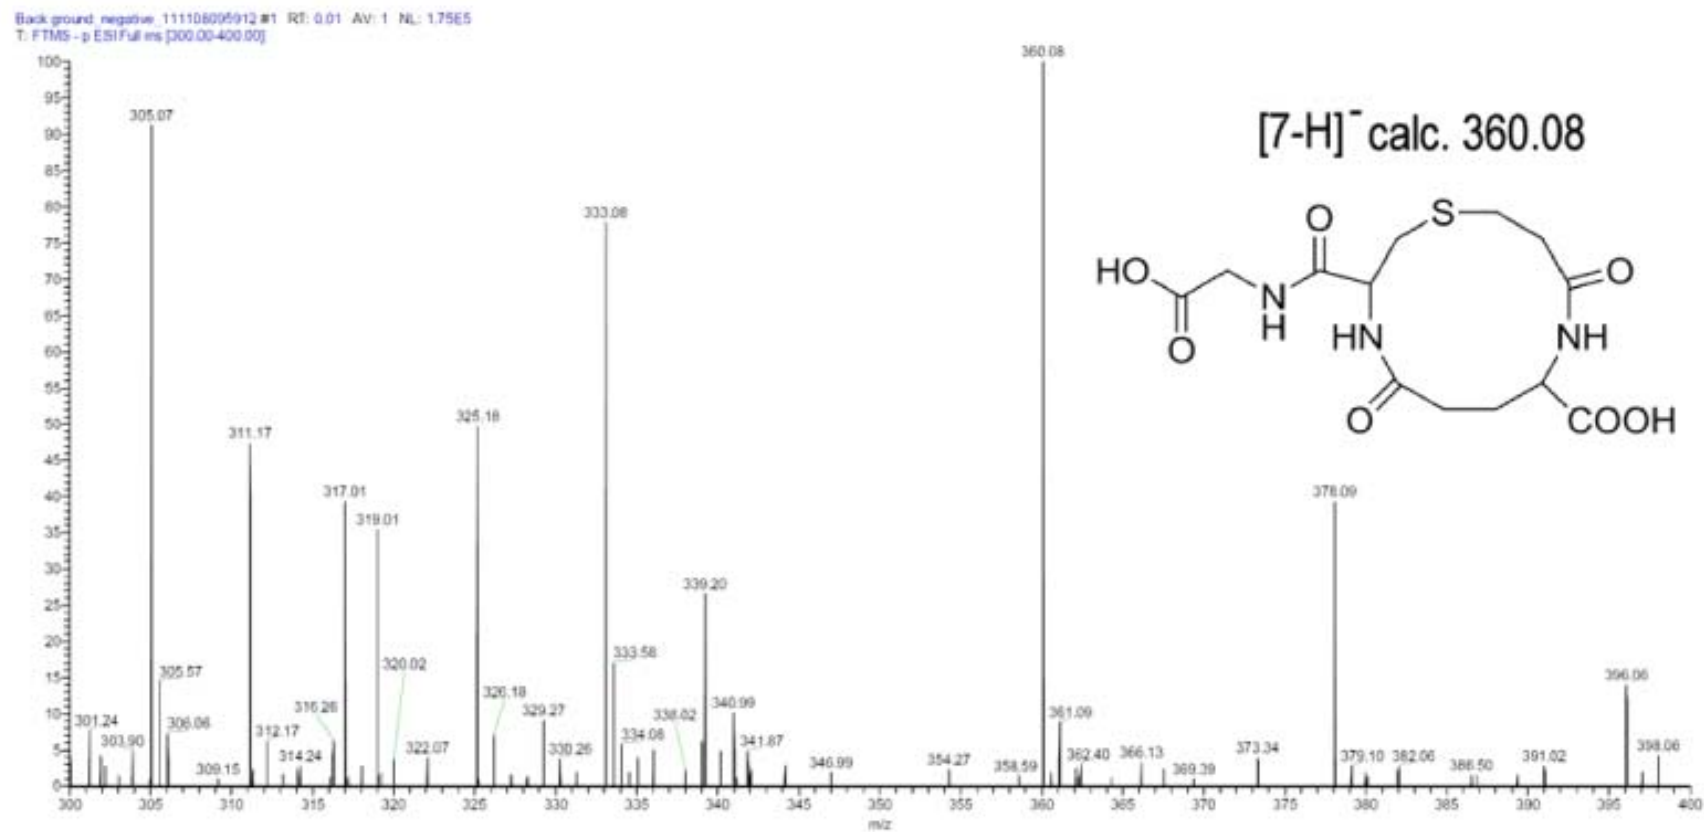

**Figure S12.** Spectral behavior of the 4-CTAB system under different pH conditions (50 mM phosphate buffer). (a) Time-dependent absorbance changes of a solution of **4** (2.5  $\mu\text{M}$ ) at 580 nm in CTAB media (2 mM) buffered at pH 5.5 to 8; (b) Absorbance spectra of **4** in pH 6, 7, and 8 phosphate buffer after 1 min; (c) Absorbance spectra of **4** in pH 6, 7 and 8 phosphate buffer after 10 min.

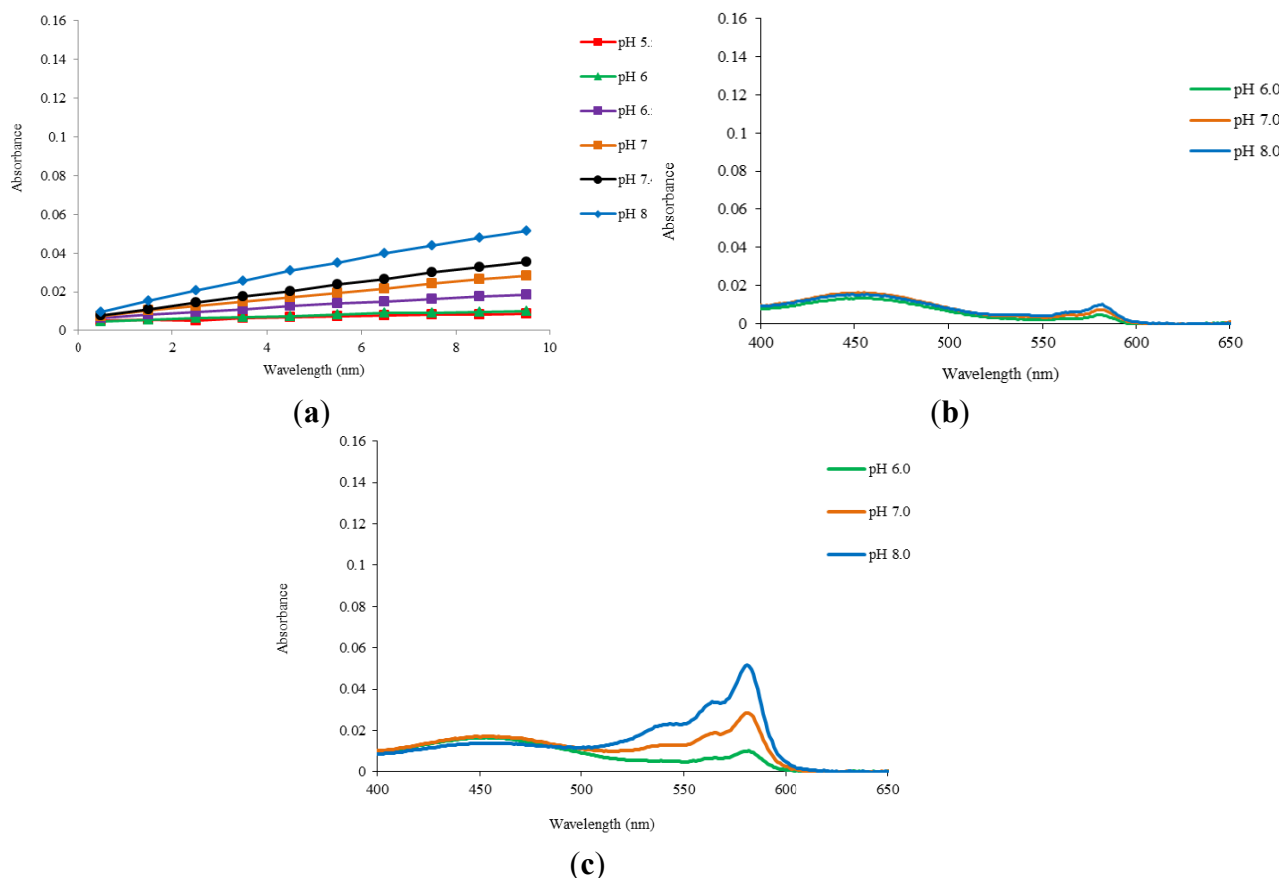

**Figure S13.** Fluorescence spectra ( $\lambda_{\text{ex}} = 565 \text{ nm}$ ) of **4** (1.5  $\mu\text{M}$ ) upon addition of GSH (0–2.0  $\mu\text{M}$ ) and Cys (2  $\mu\text{M}$ ) to 10% deproteinized plasma diluted with 2.0 mM CTAB media buffered at pH 6.0 (phosphate buffer, 50 mM). The emission spectra were collected 8 min after mixing.

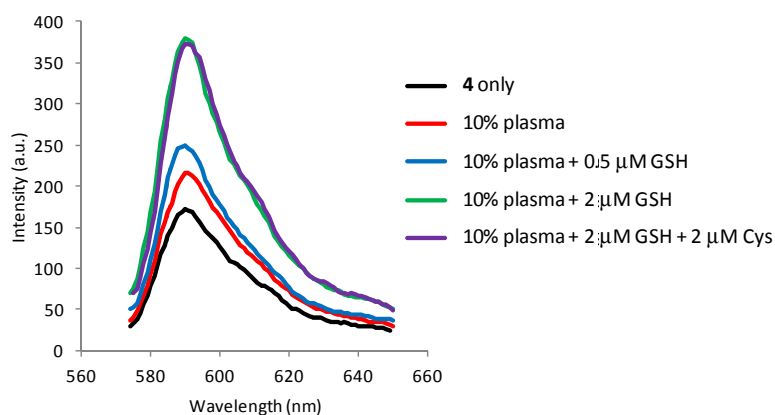

Supplement: Supplementary file 1 [file sensors-12-05940-s001.pdf]
